# Supplementary material for: Generic Self-Reported Questionnaires Measuring Self-Management: A Scoping Review
Source: PubMed Central journal article supplement — Clin Nurs Res. 2020 Nov 30;30(6):855–65. doi: 10.1177/1054773820974149 (PMC8216317; doi:10.1177/1054773820974149), 2020-11-30
Supplement: sj-pdf-1-cnr-10.1177_1054773820974149.pdf [file sj-pdf-1-cnr-10.1177_1054773820974149.pdf]

## Appendix 1. Theoretical foundations of the questionnaires

| <i>Questionnaire</i>               | <i>Theoretical referents</i>               | <i>Main construct measured</i>                | <i>Definition of self-management and/or main construct measured</i>                                                                                                                                                                                                                                                                                                                                 | <i>Dimensions/domains (sub-dimensions/domains)</i>                                                                                                                                                                                                                                            |
|------------------------------------|--------------------------------------------|-----------------------------------------------|-----------------------------------------------------------------------------------------------------------------------------------------------------------------------------------------------------------------------------------------------------------------------------------------------------------------------------------------------------------------------------------------------------|-----------------------------------------------------------------------------------------------------------------------------------------------------------------------------------------------------------------------------------------------------------------------------------------------|
| <i>ASAS (Evers, 1989)</i>          | Orem's Self-Care Deficit Theory of Nursing | Self-care agency                              | Self-care agency: the complex acquired ability to meet one's continuing requirements for care that regulates life processes, maintains or promotes integrity of human structure and functioning and human development, and promotes well-being.<br>Self-care: the practice of activities that individuals initiate and perform on their own behalf in maintaining life, health and well-being [38]. | <b>Unidimensional</b>                                                                                                                                                                                                                                                                         |
| <i>ASAS-R (Sousa et al., 2009)</i> | Orem's Self-Care Deficit Theory of Nursing | Self-care agency                              | Self-care agency: an individual's capability to perform self-care activities or health-promoting behaviours on their own behalf to maintain life, health and well-being and is developed during an individual's lifespan.                                                                                                                                                                           | <b>Multidimensional (3)</b> <ul style="list-style-type: none"> <li>• Having power for self-care</li> <li>• Developing power for self-care</li> <li>• Lacking power for self-care</li> </ul>                                                                                                   |
| <i>heiQ (Osborne et al., 2006)</i> | Program Logic Model                        | Proximal outcomes of self-management programs | Outcomes of self-management include a positive and active engagement in life, health-directed behavior, skill and technique acquisition, constructive attitudes and approaches, self-monitoring and insight, health services navigation, social integration and support, and emotional wellbeing.                                                                                                   | <b>Multidimensional (8)</b> <ul style="list-style-type: none"> <li>• Positive and active engagement in life</li> <li>• Health-directed behavior</li> <li>• Skill and technique acquisition</li> <li>• Constructive attitudes and approaches</li> <li>• Self-monitoring and insight</li> </ul> |

| Questionnaire                         | Theoretical referents                                                                         | Main construct measured | Definition of self-management and/or main construct measured                                                                                                                                                                                                                                                                                                                                                                                                                                                      | Dimensions/domains (sub-dimensions/domains)                                                                                                                                                                                                             |
|---------------------------------------|-----------------------------------------------------------------------------------------------|-------------------------|-------------------------------------------------------------------------------------------------------------------------------------------------------------------------------------------------------------------------------------------------------------------------------------------------------------------------------------------------------------------------------------------------------------------------------------------------------------------------------------------------------------------|---------------------------------------------------------------------------------------------------------------------------------------------------------------------------------------------------------------------------------------------------------|
|                                       |                                                                                               |                         |                                                                                                                                                                                                                                                                                                                                                                                                                                                                                                                   | <ul style="list-style-type: none"> <li>• Health services navigation</li> <li>• Social integration and support</li> <li>• Emotional wellbeing</li> </ul>                                                                                                 |
| <i>PAST (Van Houtum et al., 2014)</i> | <p>Theory of Stress and Coping</p> <p>Self-management activities by Bayliss et al. (2003)</p> | Self-management tasks   | Self-management involves not only the medical management of a condition but also maintaining, changing and creating new meaningful behaviors or life roles, and coping with the psychosocial consequences of chronic illness.                                                                                                                                                                                                                                                                                     | <p><b>Multidimensional (4)</b></p> <ul style="list-style-type: none"> <li>• Medical management</li> <li>• Communication with healthcare providers</li> <li>• Coping with the consequences of the illness</li> <li>• Making lifestyle changes</li> </ul> |
| <i>PIH (Battersby, et al., 2003)</i>  | Flinders model [39]                                                                           | Self-management         | Self-management: involves the individual working in partnership with their carer(s) and health professionals so that (s)he can: 1) Know their condition and various treatment options; 2) Negotiate a plan of care; (i.e., care plan); 3) Engage in activities that protect and promote health; 4) Monitor and manage the symptoms and signs of the condition(s); 5) Manage the impact of the condition on physical functioning, emotions and interpersonal relationships (Lorig, 1993) (Battersby et al., 2003). | <p><b>Unidimensional (4)</b></p> <ul style="list-style-type: none"> <li>• Knowledge</li> <li>• Treatment adherence</li> <li>• Recognizing and managing symptoms</li> <li>• Dealing with / managing side effects</li> </ul>                              |

| <i>Questionnaire</i>                     | <i>Theoretical referents</i>                                                                           | <i>Main construct measured</i> | <i>Definition of self-management and/or main construct measured</i>                                                                                                                                                                                                                                                   | <i>Dimensions/domains (sub-dimensions/domains)</i>                                                                                                                                                                                                                                                                                                                   |
|------------------------------------------|--------------------------------------------------------------------------------------------------------|--------------------------------|-----------------------------------------------------------------------------------------------------------------------------------------------------------------------------------------------------------------------------------------------------------------------------------------------------------------------|----------------------------------------------------------------------------------------------------------------------------------------------------------------------------------------------------------------------------------------------------------------------------------------------------------------------------------------------------------------------|
| <i>PS-CAQ (Hanson, 1981)</i>             | Orem's Self-Care Deficit Theory of Nursing                                                             | Self-care agency               | Self-care agency: the power or capacity to perform actions toward the goal of self-care. Two operations were identified to specify how the power of self-care agency is to be directed: the estimative operation (determining what needs to be done) and the productive operation (doing what needs to be done) [40]. | <b>Multidimensional (10)</b> <ul style="list-style-type: none"> <li>• Attention and vigilance</li> <li>• Controlled use of energy</li> <li>• Control of body position</li> <li>• Reasoning</li> <li>• Motivation</li> <li>• Decision making</li> <li>• Knowledge-acquisition</li> <li>• Repertoire skills</li> <li>• Time ordering</li> <li>• Integration</li> </ul> |
| <i>SMAS-30 (Schuurmans et al., 2005)</i> | Theory of Successful Self-Management of Aging based on the Theory of Social Production Functions (SPF) | Self-management ability        | Self-management ability: the core behavioral and cognitive abilities which contribute to sustainable well-being in later life [41].                                                                                                                                                                                   | <b>Unidimensional (6)</b> <ul style="list-style-type: none"> <li>• Multifunctionality of resources</li> <li>• Variety in resources</li> <li>• Positive frame of mind</li> <li>• Investment behavior</li> <li>• Self-efficacious</li> <li>• Taking initiative</li> </ul>                                                                                              |
| <i>SMAS-S (Cramm et al., 2012)</i>       | Theory of Successful Self-Management of Aging based on the Theory of Social Production Functions (SPF) | Self-management ability        | Self-management ability: capacities to realize and sustain physical and social well-being using external and internal resources.                                                                                                                                                                                      | <b>Unidimensional (6)</b> <ul style="list-style-type: none"> <li>• Multifunctionality of resources</li> <li>• Variety in resources</li> <li>• Positive frame of mind</li> <li>• Investment behavior</li> <li>• Self-efficacious</li> <li>• Taking initiative</li> </ul>                                                                                              |

| <i>Questionnaire</i>                   | <i>Theoretical referents</i>                                           | <i>Main construct measured</i> | <i>Definition of self-management and/or main construct measured</i>                                                                                                                                                                                                                                                                                                                                                              | <i>Dimensions/domains (sub-dimensions/domains)</i>                                                                                                                                                                                         |
|----------------------------------------|------------------------------------------------------------------------|--------------------------------|----------------------------------------------------------------------------------------------------------------------------------------------------------------------------------------------------------------------------------------------------------------------------------------------------------------------------------------------------------------------------------------------------------------------------------|--------------------------------------------------------------------------------------------------------------------------------------------------------------------------------------------------------------------------------------------|
| SeMaS<br>(Eikelenboom<br>et al., 2013) | None stated                                                            | Self-management                | Self-management: the care taken by individuals towards their own health and well-being: it comprises the actions they take to lead a healthy lifestyle; to meet their social, emotional and psychological needs; to care for their long-term condition; and to prevent further illness or accidents. Following this definition, self-management also means that the patient takes more responsibility for his or her own health. | <b>Multidimensional (6)</b> <ul style="list-style-type: none"> <li>• Perceived burden of disease</li> <li>• Locus of control</li> <li>• Self-efficacy</li> <li>• Social support</li> <li>• Coping</li> <li>• Anxiety/depression</li> </ul> |
| TSC (Sidani, 1999)                     | Concept clarification between self-care behavior and self-care ability | Self-care ability              | Self-care behaviour refers to the actual performance of activities for the purpose of maintaining healthy functioning and treatment recommendations for managing an illness or disease.<br>Self-care ability reflects the capacity to engage in self-care behaviour.                                                                                                                                                             | <b>Unidimensional (4)</b> <ul style="list-style-type: none"> <li>• Taking medication</li> <li>• Recognizing and managing symptoms</li> <li>• Carrying out activities of daily living</li> <li>• Managing changes in condition</li> </ul>   |

Legend Appendix 1. Abbreviations ASAS: Appraisal of Self-care Agency Scale, ASAS-R: Appraisal of Self-Care Agency Scale – Revised, CCs: chronic conditions, heiQ: Health education impact Questionnaire, PAST: Patient Assessment of Self-care Management Tasks, PIH: Partners in Health, PS-CAQ: Perception of/Perceived Self-Care Agency Questionnaire, SMAS-30: Self-Management Ability Scale – 30, SMAS-S: Self-Management Ability Shorter – Scale; SeMaS: Self-Management Screening; TSC: Therapeutic Self-Care.
